# Supplementary material
Source: MDPI journal article supplement (https://www.mdpi.com/2073-4433/10/5/256)
Supplement: s1 [file s1]

# Supplementary Material of “Variability of summer precipitation events associated with tropical cyclones over mid-lower reaches of Yangtze River basin: role of the El Niño-Southern Oscillation”

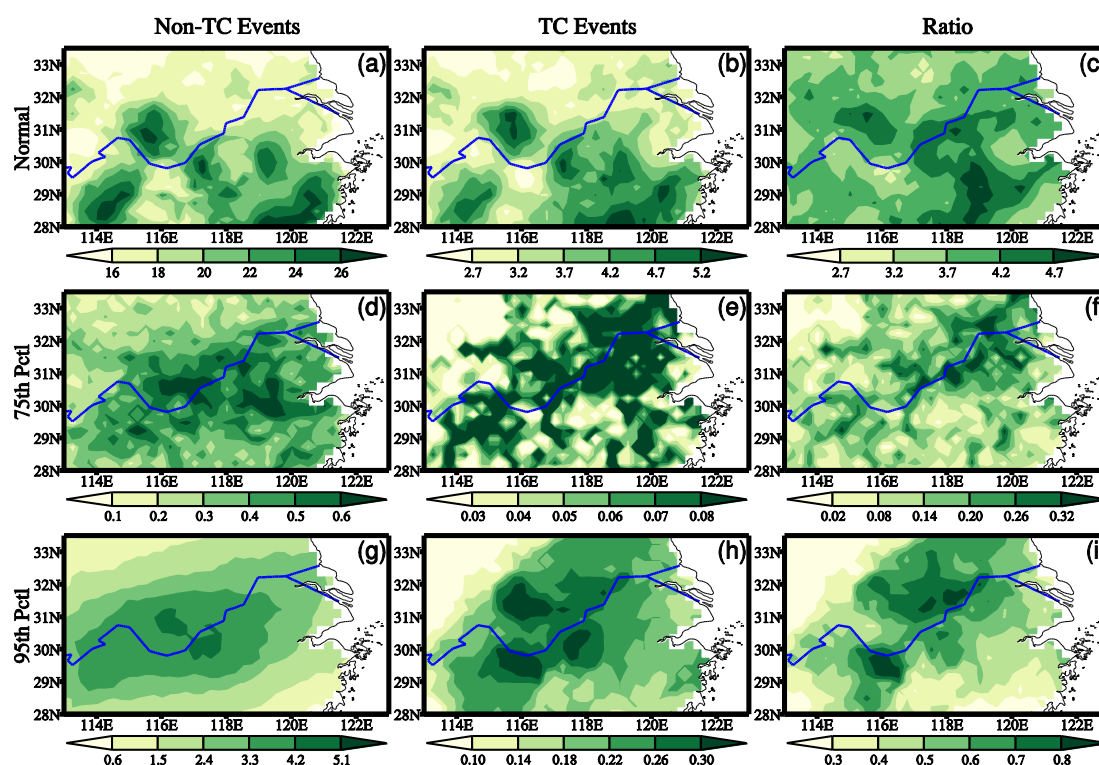

**Figure S1.** (a), (b) and (c) Spatial distribution of the number of summer non-TC rainfall events and TC-induced rainfall events as well as relative contribution of TC-induced rainfall events to the summer rainfall events for normal precipitation events, respectively, shade denotes the number of precipitation events. (d), (e) and (f) The same as (a), (b) and (c), but for 75th percentile precipitation events. (g), (h) and (i) The same as (a), (b) and (c), but for 95th percentile precipitation events. The bold blue curve denotes the Yangtze River.

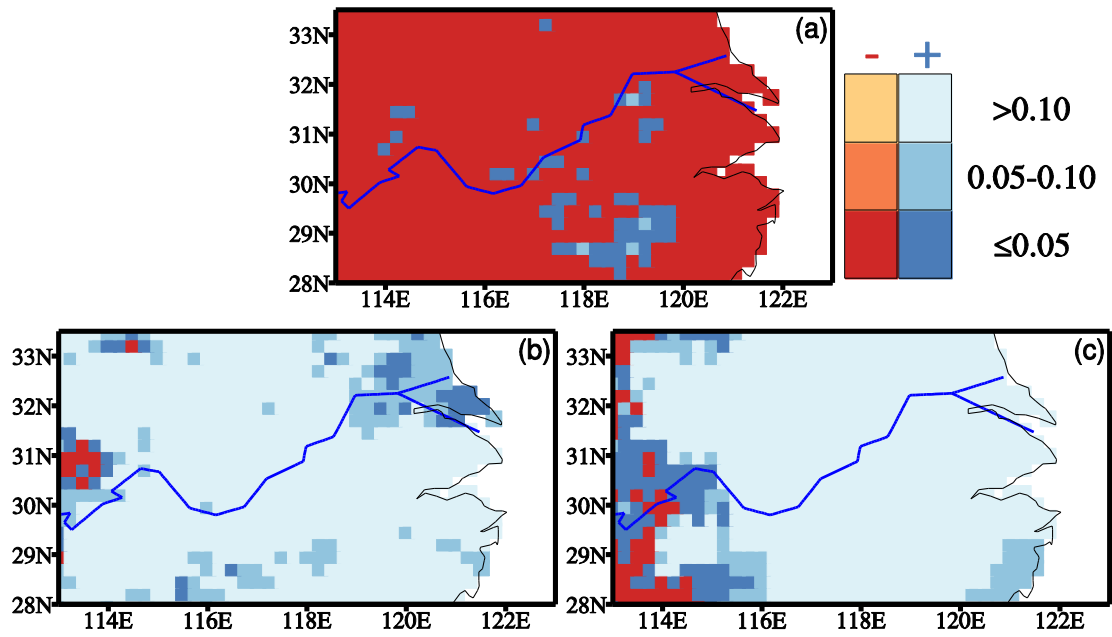

**Figure S2.** Relationship between summertime precipitation events associated with TCs and summer Niño 3 index, regression coefficients derived from logistic regression displayed at different level of significance. (a) Normal rainfall events. (b) 75th percentile precipitation events. (c) 95th percentile precipitation events. The bold blue curve denotes the Yangtze River..

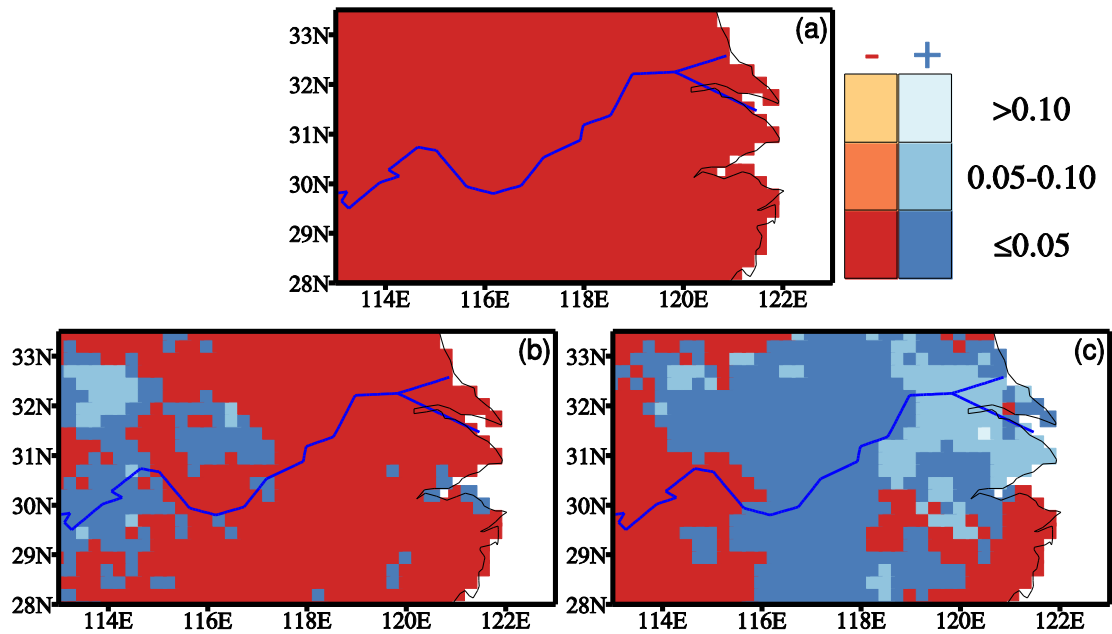

**Figure S3.** The same as Fig. S2. But for preceding spring ENSO.

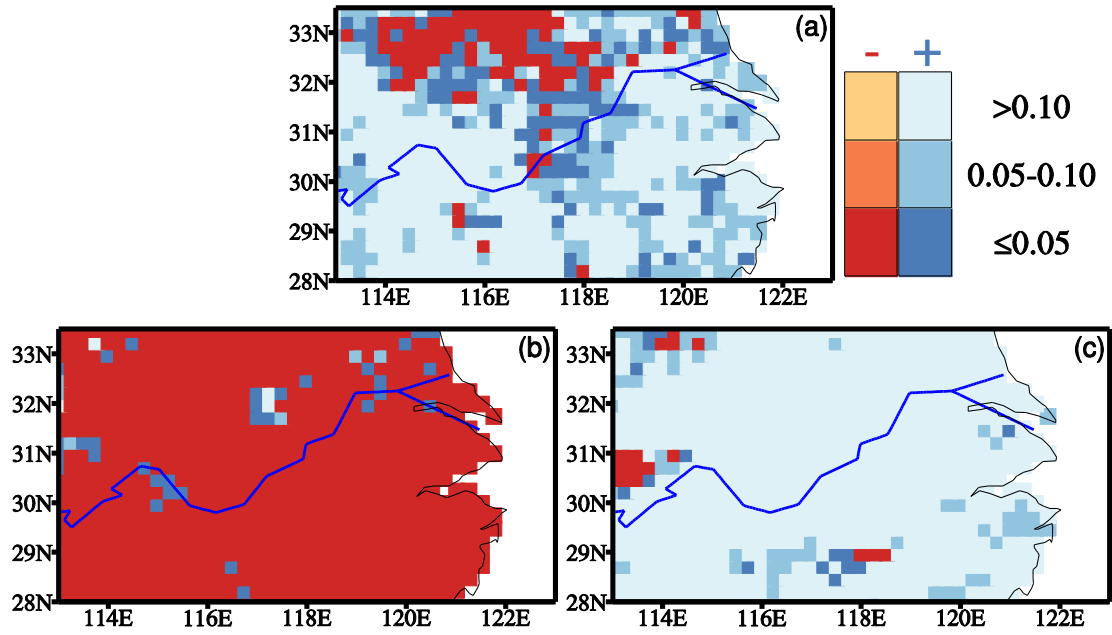

**Figure S4.** The same as Fig. S2. But for preceding winter ENSO.

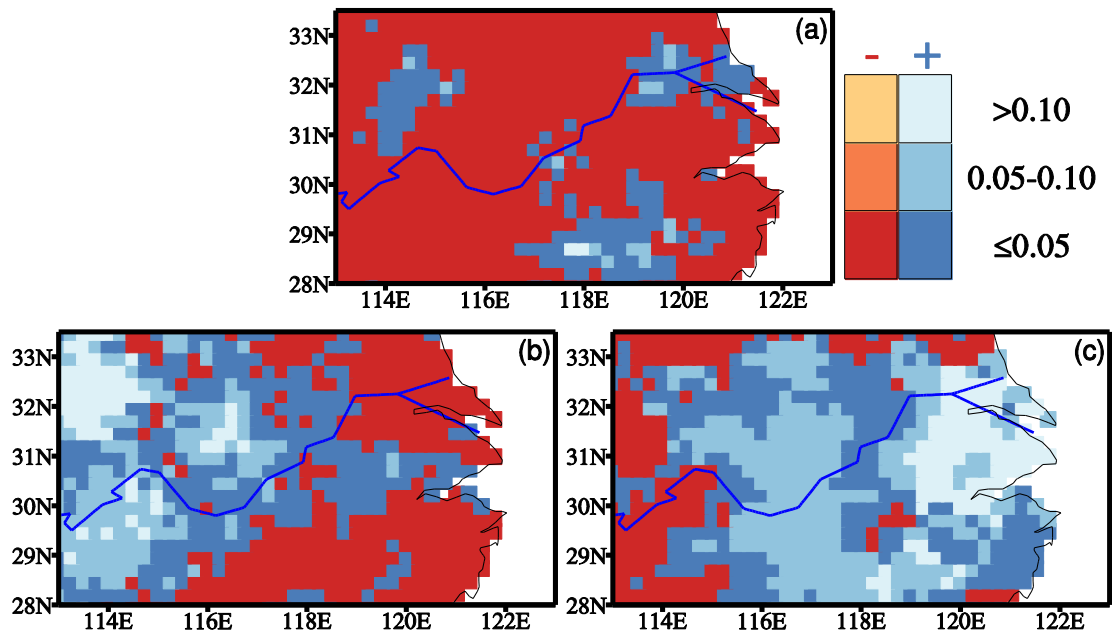

**Figure S5.** Relationship between summertime precipitation events associated with TCs and summer Niño 4 index, regression coefficients derived from logistic regression displayed at different level of significance. (a) Normal rainfall events. (b) 75th percentile precipitation events. (c) 95th percentile precipitation events. The bold blue curve denotes the Yangtze River.

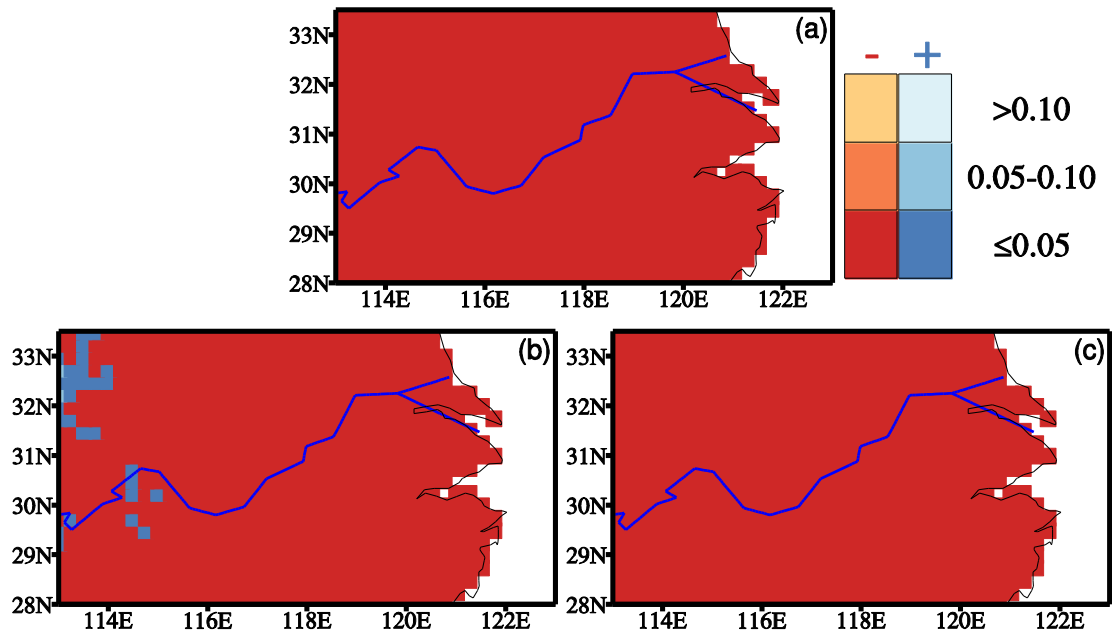

Figure S6. The same as Fig. S5. But for preceding spring ENSO.

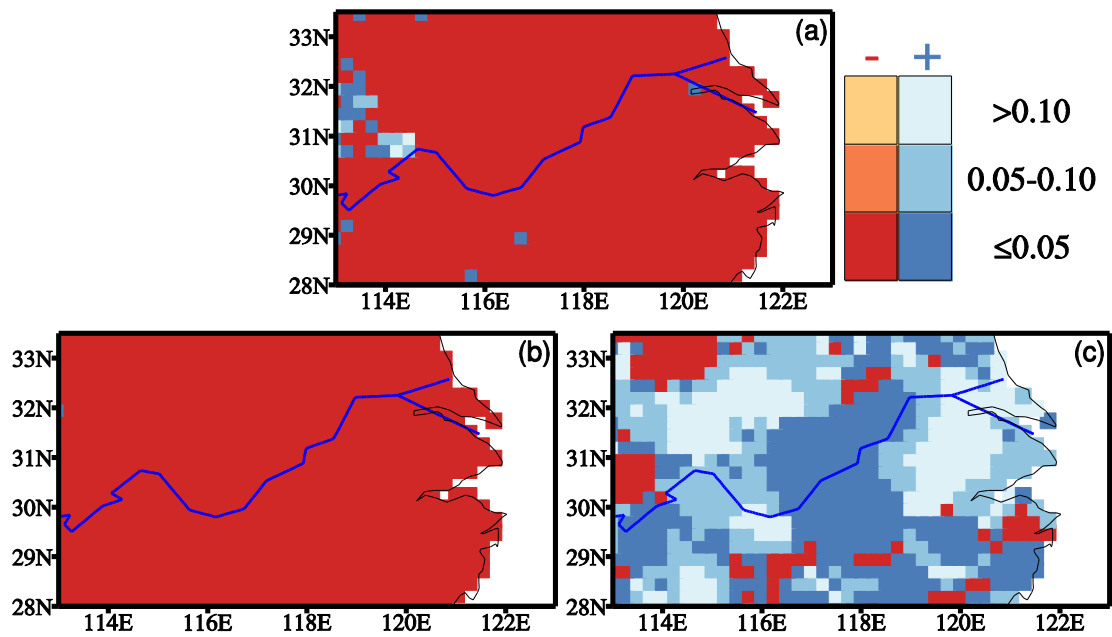

Figure S7. The same as Fig. S5. But for preceding winter ENSO.

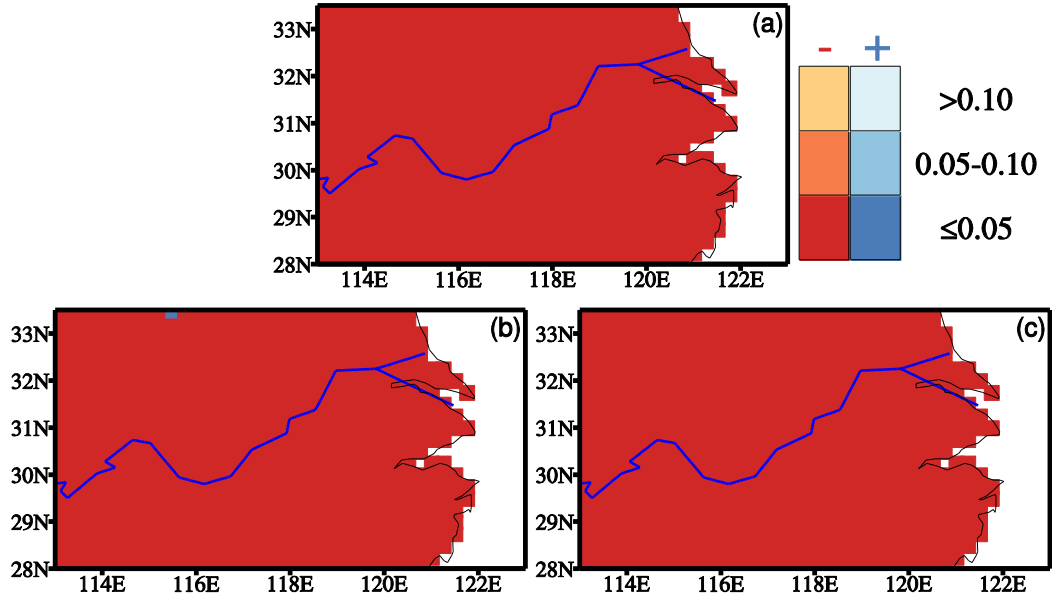

**Figure S8.** Relationship between summertime precipitation events associated with TCs and preceding winter Philippine Sea anticyclone (PSAC), regression coefficients derived from logistic regression displayed at different level of significance. (a) Normal rainfall events. (b) 75th percentile precipitation events. (c) 95th percentile precipitation events. The bold blue curve denotes the Yangtze River.

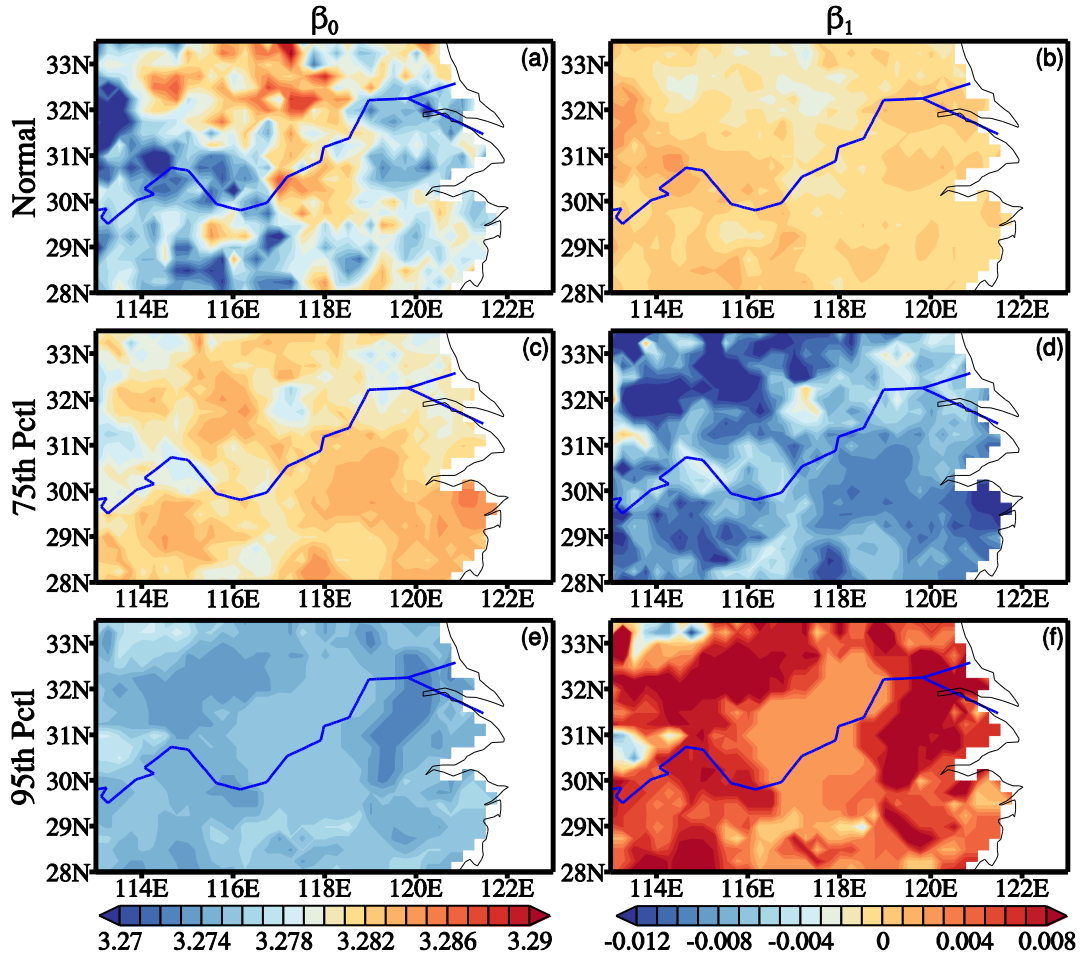

**Figure S9.** The values of  $\beta_0$  and  $\beta_1$  when the Niño-3.4 index is used as covariate of averaged for preceding winter.
